# Supplementary material for: Serum ionised calcium and the risk of acute respiratory failure in hospitalised patients: a single-centre cohort study in the USA
Source: PubMed Central journal article supplement — BMJ Open. 2020 Mar 23;10(3):e034325. doi: 10.1136/bmjopen-2019-034325 (PMC7103831; doi:10.1136/bmjopen-2019-034325), 2020-03-23

**Table S1** The association between admission serum ionized calcium levels and hypercapnic respiratory failure requiring mechanical ventilation

| Serum ionized calcium level at hospital admission (mg/dl) | Hypercarbic respiratory failure | Univariate analysis |        | Multivariate analysis |        |
|-----------------------------------------------------------|---------------------------------|---------------------|--------|-----------------------|--------|
|                                                           |                                 | OR (95% CI)         | p      | Adjusted OR (95% CI)  | P      |
| ≤4.39                                                     | 81 (3.5)                        | 4.12 (2.72-6.26)    | <0.001 | 3.06 (1.99-4.71)      | <0.001 |
| 4.40-4.59                                                 | 70 (2.0)                        | 2.31 (1.51-3.54)    | <0.001 | 2.02 (1.32-3.12)      | 0.001  |
| 4.60-4.79                                                 | 103 (1.5)                       | 1.69 (1.13-2.53)    | 0.01   | 1.62 (1.08-2.43)      | 0.02   |
| 4.80-4.99                                                 | 94 (1.3)                        | 1.53 (1.02-2.30)    | 0.03   | 1.51 (0.98-2.27)      | 0.06   |
| 5.00-5.19                                                 | 31 (0.9)                        | 1 (ref)             | -      | 1 (ref)               | -      |
| ≥5.20                                                     | 24 (1.2)                        | 1.39 (0.82-2.38)    | 0.23   | 1.38 (0.80-2.37)      | 0.25   |

Adjusted for age, sex, race, eGFR, Charlson Comorbidity Score, history of coronary artery disease, hypertension, diabetes mellitus, congestive heart failure, chronic obstructive pulmonary disease, asthma, dementia, stroke, cirrhosis, end-stage renal disease, obesity, principal diagnosis, acute kidney injury and vasopressor use at hospital admission

**Table S2** Clinical characteristics between patients with and without admission ionized calcium measurement

|                                  | No admission ionized calcium measurement | Included patients | p-value |
|----------------------------------|------------------------------------------|-------------------|---------|
| Age (year)                       | 61±18                                    | 63±17             | <0.001  |
| Male                             | 53%                                      | 54%               | <0.001  |
| Caucasian                        | 93%                                      | 92%               | <0.001  |
| GFR (ml/min/1.73m <sup>2</sup> ) | 78±28                                    | 73±32             | <0.001  |
| Charlson score                   | 1.8±2.3                                  | 2.3±2.6           | <0.001  |
| Principal diagnosis              |                                          |                   | <0.001  |
| - Cardiovascular                 | 21%                                      | 22%               |         |
| - Hematology/Oncology            | 15%                                      | 21%               |         |
| - Infectious disease             | 3%                                       | 4%                |         |
| - Endocrine/metabolic            | 3%                                       | 4%                |         |
| - Respiratory                    | 4%                                       | 4%                |         |
| - Gastrointestinal               | 9%                                       | 11%               |         |
| - Genitourinary                  | 4%                                       | 4%                |         |
| - Injury and poisoning           | 15%                                      | 13%               |         |
| - Other                          | 25%                                      | 16%               |         |

**Figure S1** study flow chart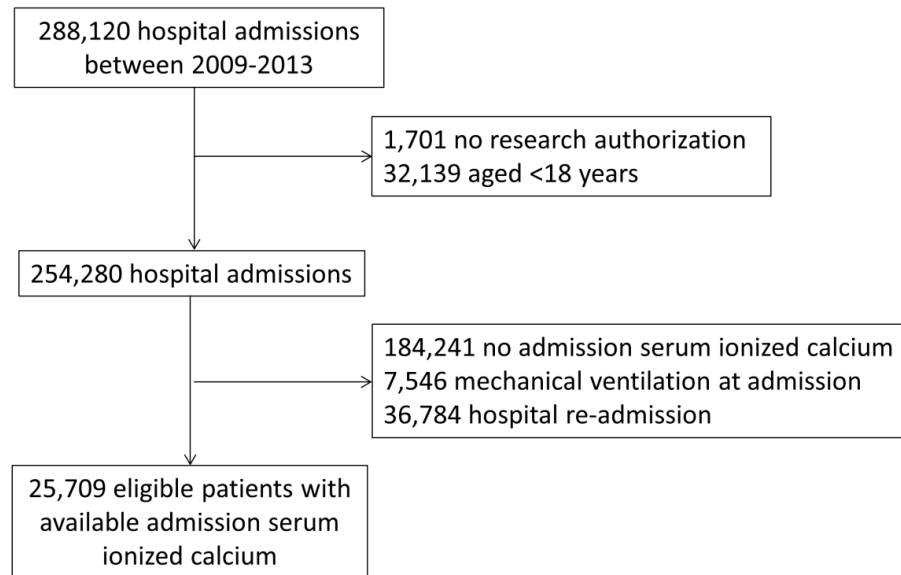

Supplement: bmjopen-2019-034325supp001.pdf [file bmjopen-2019-034325supp001.pdf]
